# Supplementary material for: Rationalization and tuning of doublet emission in organic radicals
Source: Royal Society of Chemistry journal article supplement (doi:10.1039/d2tc01632j), 2022-01-01
Supplement: d2tc01632j1.pdf [file d2tc01632j1.pdf]

## Rationalization and tuning of doublet emission in organic radicals

Claire Tonnelé,<sup>a,\*</sup> David Casanova<sup>a,b</sup>

<sup>a</sup> Donostia International Physics Center (DIPC), 20018 Donostia, Euskadi, Spain

<sup>b</sup> Ikerbasque Foundation for Science, 48009 Bilbao, Euskadi, Spain

### List of contents

#### Low-lying electronic states of TTM

Figure S1. Molecular structure of TTM and molecular orbital diagram.

Table S1. Vertical transition energies (in eV) to the lowest excited doublet states, oscillator strength, and dominant contributions computed at the PBE0/6-311G(d,p) level for **1**.

#### Radical-ligand interactions

Figure S2. Molecular structure of TTM-like model system **0** for  $\theta = 90^\circ$  and molecular orbital diagram.

Table S2. Vertical transition energies (in eV) to the lowest excited doublet states, oscillator strength, and dominant contributions computed at the PBE0/6-311G(d,p) level for **0** at  $\theta = 90^\circ$ .

Figure S3. Evolution of the energy of the SOMO/SUMO (green/purple) and HOMO/LUMO (in grey) of **0** as a function of the dihedral angle  $\theta$ .

#### Diabatization of the adiabatic states at the ground state ( $D_3$ ) geometry of **1**

Table S3. e-/h+ contributions to the relative Mulliken fragment charges of diabatic states  $Z_{1-4}$ .

Table S4. Energy (in eV) and transition dipole moment components (in D) of diabatic states  $Z_{1-4}$ .

Diabatic Hamiltonian (ground state ( $D_3$ ) geometry)

#### Excited state relaxation

Table S5. Bonds and dihedrals at the  $D_3$  and  $C_2$  geometries.

Table S6. Vertical transition energies (in eV) to the lowest excited doublet states, oscillator strength, dominant contributions and transition dipole moment components (in D) computed at the PBE0/6-311G(d,p) level at the  $C_2$  geometry.

#### Diabatization of the adiabatic states computed at the $D_1$ optimized geometry of **1**

Table S7. e-/h+ contributions to the relative Mulliken fragment charges of diabatic states  $Z_{1-4}$ .

Figure S4. TTM molecule with vector representation of TDMs of  $Z_{1-4}$  diabatic states at the lowest excited state ( $C_2$ ) geometry of **1**.

Table S8. Energy (in eV) and transition dipole moment components (in D) of diabatic states  $Z_{1-4}$  at the lowest excited state ( $C_2$ ) geometry of **1**.

#### Substituted TTM

Figure S5. Energy of the SOMO/SUMO (green/purple) and HOMO/LUMO (in grey) for **1**, **1H**, **1NO<sub>2</sub>**, **1NH<sub>2</sub>**, **1'NH<sub>2</sub>**, and **1''NH<sub>2</sub>**.

Table S9. Vertical transition energies (in eV) to the lowest excited doublet state, oscillator strength, and dominant contributions computed at the PBE0/6-311G(d,p) level for **1H**, **1NO<sub>2</sub>**, **1NH<sub>2</sub>**, **1'NH<sub>2</sub>**, and **1''NH<sub>2</sub>**.

## Low-lying electronic states of TTM

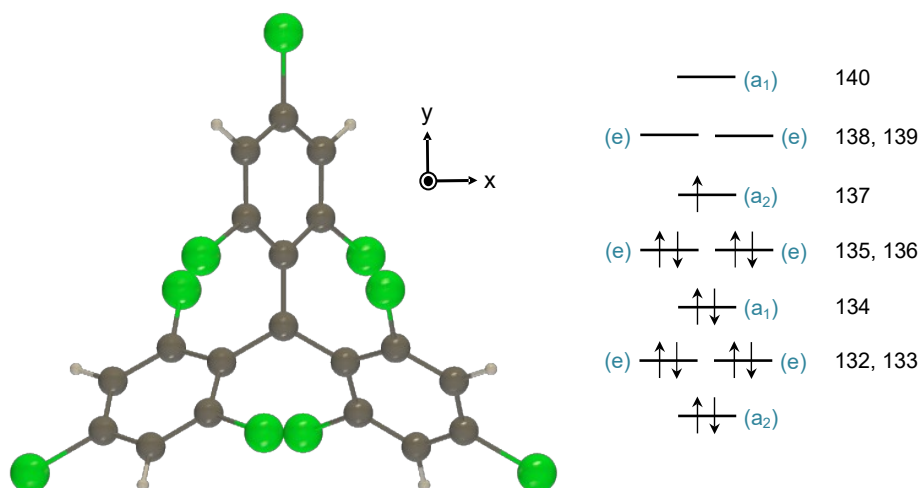

Figure S1. Molecular structure of TTM and molecular orbital diagram.

Table S1. Vertical transition energies (in eV) to the lowest excited doublet states, oscillator strength, and dominant contributions computed at the PBE0/6-311G(d,p) level for **1**.

| state                    | E     | f     | contrib.                    | coeff  |
|--------------------------|-------|-------|-----------------------------|--------|
| <b>1 (E)</b>             | 2.904 | 0.027 | 137A $\leftrightarrow$ 138A | 0.284  |
|                          |       |       | 133B $\leftrightarrow$ 137B | -0.264 |
|                          |       |       | 136B $\leftrightarrow$ 137B | 0.885  |
| <b>2 (E)</b>             | 2.904 | 0.027 | 137A $\leftrightarrow$ 139A | -0.284 |
|                          |       |       | 132B $\leftrightarrow$ 137B | 0.264  |
|                          |       |       | 135B $\leftrightarrow$ 137B | 0.885  |
| <b>3 (E)</b>             | 3.173 | 0.004 | 137A $\leftrightarrow$ 138A | -0.225 |
|                          |       |       | 133B $\leftrightarrow$ 137B | 0.878  |
|                          |       |       | 136B $\leftrightarrow$ 137B | 0.348  |
| <b>4 (E)</b>             | 3.173 | 0.004 | 137A $\leftrightarrow$ 139A | -0.225 |
|                          |       |       | 132B $\leftrightarrow$ 137B | 0.878  |
|                          |       |       | 135B $\leftrightarrow$ 137B | -0.348 |
| <b>5 (A<sub>1</sub>)</b> | 3.195 | 0.009 | 137A $\leftrightarrow$ 140A | 0.209  |
|                          |       |       | 134B $\leftrightarrow$ 137B | 0.957  |
| <b>6 (A<sub>2</sub>)</b> | 3.324 | 0     | 137A $\leftrightarrow$ 146A | -0.252 |
|                          |       |       | 131B $\leftrightarrow$ 137B | 0.883  |
| <b>7 (E)</b>             | 3.598 | 0.222 | 137A $\leftrightarrow$ 139A | 0.830  |
|                          |       |       | 132B $\leftrightarrow$ 137B | 0.329  |
|                          |       |       | 135B $\leftrightarrow$ 137B | 0.240  |
| <b>8 (E)</b>             | 3.598 | 0.222 | 137A $\leftrightarrow$ 138A | 0.830  |
|                          |       |       | 133B $\leftrightarrow$ 137B | 0.329  |
|                          |       |       | 136B $\leftrightarrow$ 137B | -0.240 |

reported contributions  $\geq 0.2$  only

## Radical-ligand interactions

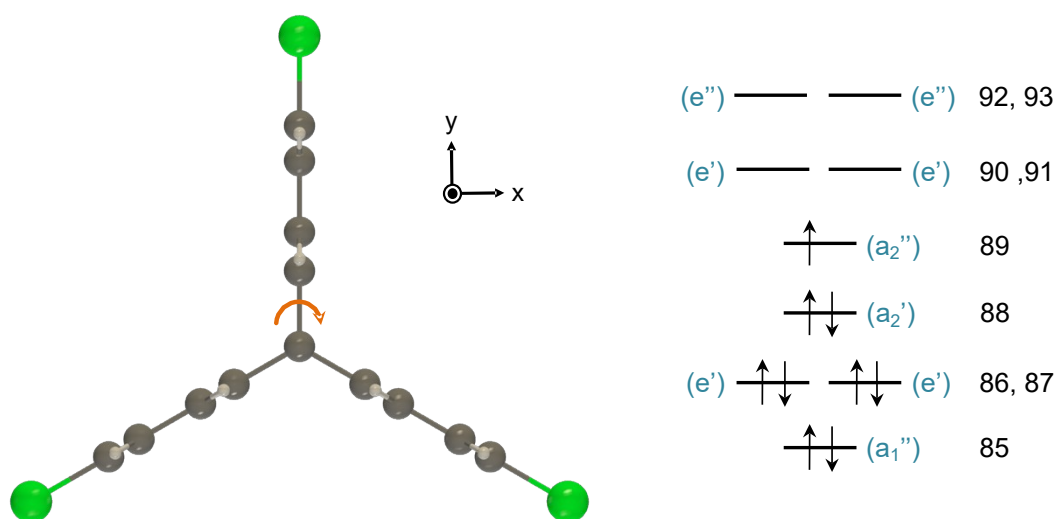

Figure S2. Molecular structure of TTM-like model system **0** for  $\theta = 90^\circ$  and molecular orbital diagram.

Table S2. Vertical transition energies (in eV) to the lowest excited doublet states, oscillator strength, and dominant contributions computed at the PBE0/6-311G(d,p) level for **0** at  $\theta = 90^\circ$ .

| state                        | E     | f | contributions    | coeff   |
|------------------------------|-------|---|------------------|---------|
| <b>1</b> (A <sub>1</sub> '') | 3.820 | 0 | 88B $\times$ 89B | 0.99044 |
| <b>5</b> (E'')               | 4.182 | 0 | 86B $\times$ 89B | 0.97606 |
| <b>6</b> (E'')               | 4.182 | 0 | 87B $\times$ 89B | 0.97606 |
| <b>7</b> (E'')               | 4.285 | 0 | 89A $\times$ 91A | 0.99235 |
| <b>8</b> (E'')               | 4.285 | 0 | 89A $\times$ 90A | 0.99235 |

reported contributions  $\geq 0.2$  only

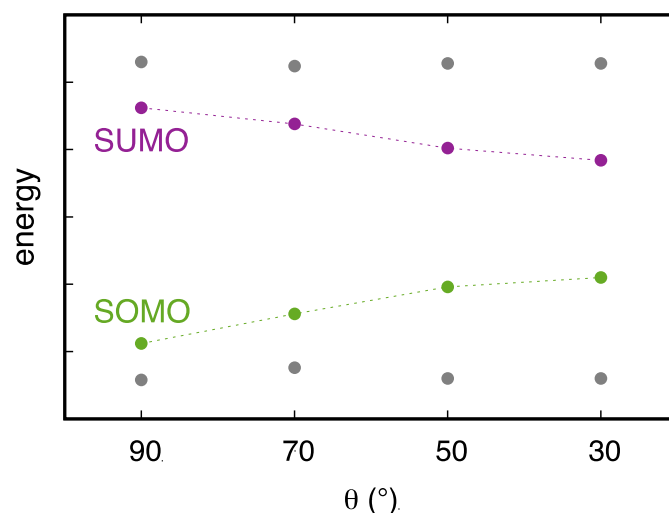

Figure S3. Evolution of the energy of the SOMO/SUMO (green/purple) and HOMO/LUMO (in grey) of **0** as a function of the dihedral angle  $\theta$ .

## Diabatization of the adiabatic states at the ground state ( $D_3$ ) geometry of **1**

Table S3. e-/h+ contributions to the relative Mulliken fragment charges of diabatic states  $Z_{1-4}$ .

| state      | $Z_1$ ( $LC_x$ ) |            | $Z_2$ ( $LC_y$ ) |            | $Z_3$ ( $CL_y$ ) |             | $Z_4$ ( $CL_x$ ) |             |
|------------|------------------|------------|------------------|------------|------------------|-------------|------------------|-------------|
|            | $\beta$ h+       | $\beta$ e- | $\beta$ h+       | $\beta$ e- | $\alpha$ h+      | $\alpha$ e- | $\alpha$ h+      | $\alpha$ e- |
| central C  | 0.011            | -0.442     | 0.011            | -0.442     | 0.262            | -0.024      | 0.262            | -0.024      |
| ligand (1) | 0.322            | -0.178     | 0.322            | -0.178     | 0.194            | -0.274      | 0.194            | -0.274      |
| ligand (2) | 0.122            | -0.173     | 0.522            | -0.184     | 0.258            | -0.477      | 0.131            | -0.070      |
| ligand (3) | 0.522            | -0.184     | 0.122            | -0.173     | 0.131            | -0.070      | 0.258            | -0.477      |

Table S4. Energy (in eV) and transition dipole moment components (in D) of diabatic states  $Z_{1-4}$ .

|                  | E     | TDM(x) | TDM(y) | TDM(z) |
|------------------|-------|--------|--------|--------|
| $Z_1$ ( $LC_x$ ) | 3.043 | 2.258  | -2.258 | 0.000  |
| $Z_2$ ( $LC_y$ ) | 3.043 | -2.258 | -2.258 | 0.000  |
| $Z_3$ ( $CL_y$ ) | 3.458 | 2.057  | 2.057  | 0.000  |
| $Z_4$ ( $CL_x$ ) | 3.458 | -2.057 | 2.057  | 0.000  |

Diabatic Hamiltonian (ground state ( $D_3$ ) geometry)

| diabatic H | Z1     | Z2     | Z3     | Z4     |
|------------|--------|--------|--------|--------|
| Z1         | 3.043  | 0.000  | 0.000  | -0.278 |
| Z2         | 0.000  | 3.043  | -0.278 | 0.000  |
| Z3         | 0.000  | -0.278 | 3.458  | 0.000  |
| Z4         | -0.278 | 0.000  | 0.000  | 3.458  |

## Excited state relaxation

Table S5. Bonds and dihedrals at the  $D_3$  and  $C_2$  geometries.

|            | $D_3$ geometry | $C_2$ geometry |
|------------|----------------|----------------|
| $\theta_1$ | 49.7           | 45.1           |
| $\theta_2$ | 49.7           | 44.3           |
| $\theta_3$ | 49.7           | 43.8           |
| $b_1$      | 1.470          | 1.428          |
| $b_2$      | 1.470          | 1.454          |
| $b_3$      | 1.470          | 1.454          |
| a          | 1.407          | 1.458          |
| d / g      | 1.407          | 1.414          |
| b          | 1.382          | 1.364          |
| e / h      | 1.382          | 1.379          |
| c          | 1.382          | 1.399          |
| f / i      | 1.382          | 1.386          |

Table S6. Vertical transition energies (in eV) to the lowest excited doublet states, oscillator strength, dominant contributions and transition dipole moment components (in D) computed at the PBE0/6-311G(d,p) level at the  $C_2$  geometry.

| state                    | E     | f     | contributions                                                  | coeff                    | TDM(x) | TDM(y) | TDM(z) |
|--------------------------|-------|-------|----------------------------------------------------------------|--------------------------|--------|--------|--------|
| <b>D<sub>1</sub> (E)</b> | 2.421 | 0.035 | 137A $\times$ 138A<br>136B $\times$ 137B                       | -0.300<br>0.930          | 0      | -0.769 | 0      |
| <b>D<sub>2</sub> (E)</b> | 2.673 | 0.034 | 137A $\times$ 139A<br>135B $\times$ 137B                       | -0.262<br>0.936          | 0.723  | 0      | -0.044 |
| <b>D<sub>7</sub> (E)</b> | 3.319 | 0.273 | 137A $\times$ 138A<br>133B $\times$ 137B<br>136B $\times$ 137B | 0.816<br>0.366<br>0.279  | 0      | -1.833 | 0      |
| <b>D<sub>8</sub> (E)</b> | 3.480 | 0.251 | 137A $\times$ 139A<br>132B $\times$ 137B<br>135B $\times$ 137B | 0.854<br>-0.274<br>0.271 | 1.715  | 0      | 0.002  |

## Diabatization of the adiabatic states at the lowest excited state ( $C_2$ ) geometry of **1**

Table S7. e-/h+ contributions to the relative Mulliken fragment charges of diabatic states  $Z_{1-4}$ .

| state      | $Z_1$      |            | $Z_2$      |            | $Z_3$       |             | $Z_4$       |             |
|------------|------------|------------|------------|------------|-------------|-------------|-------------|-------------|
|            | $\beta$ h+ | $\beta$ e- | $\beta$ h+ | $\beta$ e- | $\alpha$ h+ | $\alpha$ e- | $\alpha$ h+ | $\alpha$ e- |
| central C  | 0.018      | -0.377     | 0.009      | -0.374     | 0.215       | -0.019      | 0.242       | -0.019      |
| ligand (1) | 0.641      | -0.229     | 0.108      | -0.229     | 0.301       | -0.504      | 0.174       | -0.029      |
| ligand (2) | 0.156      | -0.183     | 0.431      | -0.189     | 0.140       | -0.136      | 0.221       | -0.405      |
| ligand (3) | 0.156      | -0.183     | 0.431      | -0.189     | 0.140       | -0.136      | 0.221       | -0.405      |

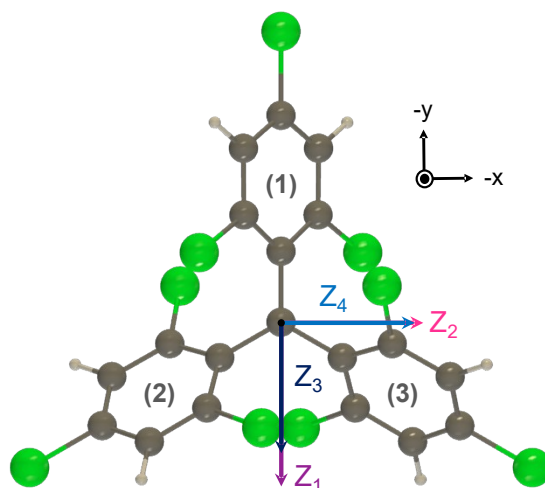

Figure S4. TTM molecule with vector representation of TDMs of  $Z_{1-4}$  diabatic states at the lowest excited state ( $C_2$ ) geometry of **1**.

Table S8. Energy (in eV) and transition dipole moment components (in D) of diabatic states  $Z_{1-4}$  at the lowest excited state ( $C_2$ ) geometry of **1**.

|       | E     | TDM(x) | TDM(y) | TDM(z) |
|-------|-------|--------|--------|--------|
| $Z_1$ | 2.421 | 0.000  | 3.968  | 0.000  |
| $Z_2$ | 2.673 | -3.451 | 0.000  | 0.100  |
| $Z_3$ | 3.108 | 0.000  | 3.126  | 0.000  |
| $Z_4$ | 3.347 | -3.236 | 0.000  | -0.050 |

### Diabatic Hamiltonian ( $C_2$ geometry)

| diabatic H | <b>Z1</b> | <b>Z2</b> | <b>Z3</b> | <b>Z4</b> |
|------------|-----------|-----------|-----------|-----------|
| <b>Z1</b>  | 2.632     | 0.000     | 0.381     | 0.000     |
| <b>Z2</b>  | 0.000     | 2.807     | 0.000     | 0.300     |
| <b>Z3</b>  | 0.381     | 0.000     | 3.108     | 0.000     |
| <b>Z4</b>  | 0.000     | 0.300     | 0.000     | 3.347     |

## Substituted TTM

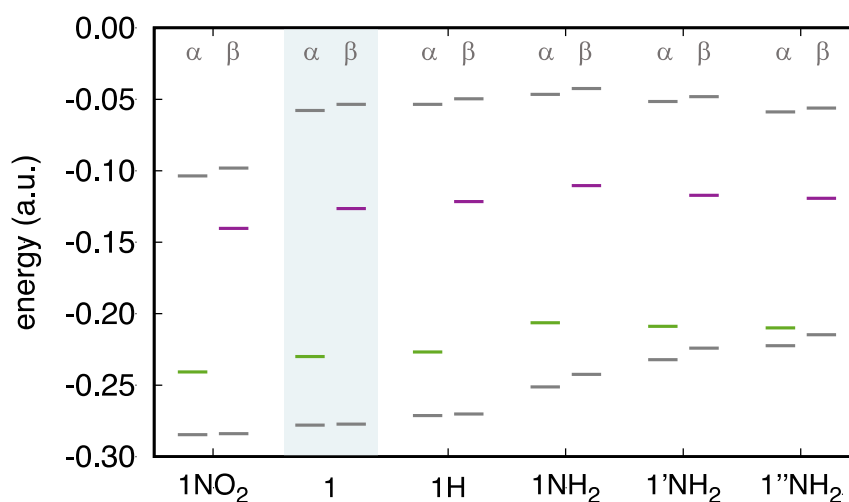

Figure S5. Energy of the SOMO/SUMO (green/purple) and HOMO/LUMO (in grey) for **1**, **1H**, **1NO<sub>2</sub>**, **1NH<sub>2</sub>**, **1'NH<sub>2</sub>**, and **1''NH<sub>2</sub>**.

Table S9. Vertical transition energies (in eV) to the lowest excited doublet state, oscillator strength, and dominant contributions (coefficient  $\geq 0.2$ ) computed at the PBE0/6-311G(d,p) level for **1H**, **1NO<sub>2</sub>**, **1NH<sub>2</sub>**, **1'NH<sub>2</sub>**, and **1''NH<sub>2</sub>**.

| molecule                 | E     | f     | contrib.             | coeff  |
|--------------------------|-------|-------|----------------------|--------|
| <b>1H</b>                | 2.906 | 0.018 | SOMO $\times$ LUMO   | 0.255  |
|                          |       |       | HOMO-2 $\times$ SUMO | 0.492  |
|                          |       |       | HOMO $\times$ SUMO   | 0.781  |
| <b>1NO<sub>2</sub></b>   | 2.764 | 0.018 | SOMO $\times$ LUMO   | 0.730  |
|                          |       |       | HOMO-5 $\times$ SUMO | 0.268  |
|                          |       |       | HOMO-4 $\times$ SUMO | -0.364 |
|                          |       |       | HOMO-1 $\times$ SUMO | -0.420 |
| <b>1NH<sub>2</sub></b>   | 2.548 | 0.082 | HOMO $\times$ SUMO   | 0.954  |
| <b>1'NH<sub>2</sub></b>  | 2.243 | 0.133 | HOMO $\times$ SUMO   | 0.943  |
| <b>1''NH<sub>2</sub></b> | 2.158 | 0.119 | HOMO-1 $\times$ SUMO | 0.221  |
|                          |       |       | HOMO $\times$ SUMO   | 0.958  |
